# Supplementary material for: Clinical and radiological outcomes when using standard versus retentive polyethylene humeral cups in Delta III reverse shoulder arthroplasty
Source: Research Square preprint supplement (doi:10.21203/rs.3.rs-7199453/v1), 2025-08-04
Supplement: Supplementary file 1 [file 0bfff60e5ba7fe8811b847ad.docx]

______________________________________________________________________

Standard cup = 35 Retentive cup = 16 Total = 51 P value

______________________________________________________________________

Men/Women 11/24 6/10 17/34 0.670

Age 70.7 68.2 69.9 0.535

Side 0.517

Left 8 7 15

Right 17 9 26

Follow-up (months) 35.6 38.3 36.4 0.542

Prosthetic indication

CA. 3 0 3

Osteoarthritis (OA). 9 1 10

IRC. 18 8 2

Post-traumatic. 5 5 10

Rheumatoid arthritis (RA) 0 2 2

CA, cuff tear arthropathy; OA, osteoarthritis; IRC, irreparable rotator cuff tear; RA, rheumatoid arthritis.
