# Supplementary material for: Clinical and radiological outcomes when using standard versus retentive polyethylene humeral cups in Delta III reverse shoulder arthroplasty
Source: Research Square preprint supplement (doi:10.21203/rs.3.rs-7199453/v1), 2025-08-04
Supplement: Supplementary file 2 [file 38668dbbce61fa43b3681bb6.docx]

_____________________________________________________________________

Standard cup (n= 35) Retentive cup (n= 16) Total (n= 51) P value

______________________________________________________________________

Luxation 0 0 0

No Notching 13 (37.2%) 6 (37.5%) 19 (37.26%)

Notching 22 (62.8%) 10 (62.5%) 32 (62.7%) 0.68

Grade 1 17 8 25 0.89

Grade 2 3 2 5

Grade 3 2 0 2

______________________________________________________________________
