# Supplementary material for: Clinical and radiological outcomes when using standard versus retentive polyethylene humeral cups in Delta III reverse shoulder arthroplasty
Source: Research Square preprint supplement (doi:10.21203/rs.3.rs-7199453/v1), 2025-08-04
Supplement: Supplementary file 3 [file e9c1067cc923832e14b39c86.docx]

______________________________________________________________________

Standard cup Retentive cup Post group

(P value)

______________________________________________________________________

Pre Post P value Pre Post P value P value

_____________________________________________________

Pain score 7.5 0.55 <0.001 7.9 0.68 <0.001 0.82

Constant score 42.7 87.9 <0.001 34.6 84 <0.001 0.27

Flexion (º). 81.1 164 <0.001 65 163.7 <0.001 0.90

Abduction (º). 78.6 134.3 <0.001 68.7 140.6 <0.001 0.16

External rotation (º). 24 36.3 <0.001 16.9 28.7 <0.004 0.05

Int. rotation (IR). 6.78 5.7 0.084 6.5 5.6 0.29 0.96

_____________________________________________________________________

IR: 2, to buttock; 4, sacrum; 6, L3; 8, T12; 10, T8.
